# Supplementary material for: All-in-one detection of breast cancer-derived exosomal miRNA on a pen-based paper chip
Source: Royal Society of Chemistry journal article supplement (doi:10.1039/d3an02032k), 2024-01-01
Supplement: d3an02032k1.pdf [file d3an02032k1.pdf]

## Supporting Information for

# All-in-one detection of breast cancer-derived exosomal miRNA on pen-based paper chip

Song Guo<sup>a</sup>, Han Xie<sup>b</sup>, Xudong Zhao<sup>b</sup>, Honghao He<sup>c</sup>, Xiaojun Feng<sup>b</sup>, Yiwei Li<sup>b</sup>,

Bi-Feng Liu<sup>b</sup> and Peng Chen<sup>\*b</sup>

*<sup>a</sup>Department of Anesthesiology, Guangdong Second Provincial General Hospital, Guangzhou, Guangdong 510317, China*

*<sup>b</sup>The Key Laboratory for Biomedical Photonics of MOE at Wuhan National Laboratory for Optoelectronics-Hubei Bioinformatics & Molecular Imaging Key Laboratory, Systems Biology Theme, Department of Biomedical Engineering, College of Life Science and Technology, Huazhong University of Science and Technology, Wuhan, 430074, China*

*<sup>c</sup>Sino-US Telemed (Wuhan) Co., Ltd.*

---

\* Corresponding authors

E-mail: gwchenpeng@mail.hust.edu.cn

Tel: +86-27-87792203

Fax: +86-27-87792170

## Preparation of lateral flow strip

### i. Pretreatment of Sample Pads

Immerse a 20 cm × 30 cm glass fiber membrane (GL-b04) in 50 mL of sample pad treatment solution. Air-dry at room temperature overnight and then dry in a 37 °C oven for 4 hours. After drying, cut into 2 cm × 30 cm strips, seal in aluminum foil bags, and store in a constant temperature and humidity chamber for later use.

### ii. Preparation of Detection Probes (AuNPs-FAM-Antibody)

Take 1.5 mL of 13 nm colloidal gold solution, add 0.2 M K<sub>2</sub>CO<sub>3</sub> to adjust the pH to 9.0. The mixture was thoroughly shaken and mixed well. Add 20 µg of streptavidin and react at room temperature for 2 hours. Add 10 µL of 10% BSA, incubate at room temperature for 1 hour, then centrifuge (10 min, 4 °C, 10000 rpm). The supernatant liquid was discarded while the labeled complex precipitate obtained after resuspending with a volume of 100 µL served as the detection probe (AuNPs-FAM-Antibody), which were stored away from light at 4 °C until further use.

### iii. Preparation of Conjugate Pads

Cut a 22 cm × 30 cm glass fiber membrane (8964) into 1 cm × 30 cm strips and set aside in a constant temperature and humidity chamber. Spray the detection probe onto the 1 cm × 30 cm glass fiber membrane at a rate of 6 µL/cm. Air-dry overnight in a 37 °C oven, seal in aluminum foil bags, and store in a constant temperature and humidity chamber for later use.

### iv. Preparation of Reaction Membrane

In the direction from conjugate pad to absorbent pad, coat 1 mg/mL anti-FAM antibody and 1 mg/mL biotin using a spray-coating instrument at a rate of 1 µL/cm onto nitrocellulose membrane (NC membrane), designated as the test line and control line, respectively. After drying overnight in a 37 °C convection oven, seal in aluminum foil bags and store in a constant temperature and humidity chamber for later use.

### v. Preparation of Absorbent Pads

Cut a 20 cm × 30 cm absorbent paper (H-2) into 2.5 cm × 30 cm strips and set aside in a constant temperature and humidity chamber.

### vi. Assembly of Test Strips

Assemble all components on a PVC baseplate in the following order: sample pad, conjugate pad, reaction membrane, and absorbent pad. Each section should overlap by 1-2 mm. Use a programmable KM-3100 strip cutter to cut the assembled strip into a width of 4 mm. Place the cut strips into aluminum foil bags, seal with desiccant, and store in a constant temperature and humidity chamber for later use.

**Table S1** Existing methods for microRNAs detection

| Reference          | Platform                                                   | Target                                                     | Detection<br>Method                                         | Mechanism                                                              | Limits of<br>detection                                                        |
|--------------------|------------------------------------------------------------|------------------------------------------------------------|-------------------------------------------------------------|------------------------------------------------------------------------|-------------------------------------------------------------------------------|
| Li et al.<br>[1]   | Electrochemical<br>biosensor                               | Lytic Exosome/<br>miRNA-21                                 | Electrochemical<br>biosensor                                | Primer exchange reaction<br>with MOF@Pt@MOF<br>nanozyme                | 0.29<br>fM                                                                    |
| Li et al.<br>[2]   | Carbon Nanotube<br>Field-Effect<br>Transistor<br>Biosensor | Purified exosomal<br>miRNA/<br>miRNA-21                    | Carbon<br>Nanotube Field-<br>Effect Transistor<br>Biosensor | Hybridization between the<br>immobilized DNA probe and<br>target miRNA | 0.87<br>aM                                                                    |
| Yang et al.<br>[3] | Micromixer<br>Biochip                                      | Intact Exosome/<br>miRNA-21<br>TTF-1 mRNA                  | Fluorescence-<br>based                                      | Cationic Lipoplex<br>Nanoparticles                                     | 2.06 ×<br>10 <sup>9</sup> and<br>3.71 ×<br>10 <sup>9</sup><br>exosomes<br>/mL |
| Zhao et al.<br>[4] | Thermophoresis                                             | Intact Exosome/<br>miRNA-375                               | Fluorescence-<br>based                                      | Hybridization of DNA<br>probes by nanoflares                           | 0.36<br>fM                                                                    |
| Cho et al.<br>[5]  | 96-well plates                                             | Intact Exosome/<br>miRNA-21<br>miRNA -574-3p<br>CD63 EpCAM | Fluorescence-<br>based                                      | Molecular beacon                                                       | -                                                                             |
| Deng et al.<br>[6] | Lateral flow assay                                         | Lytic tumor cells/<br>miRNA-21                             | Quantum dots-<br>labeled strip<br>biosensor                 | Enzyme-free catalyzed<br>hairpin assembly                              | 200<br>aM                                                                     |
| Qian et al.<br>[7] | Agarose-based<br>microfluidic chip                         | Intact Exosome/<br>miRNA-21                                | Fluorescence-<br>based                                      | Enzyme-free catalyzed<br>hairpin assembly                              | 1000<br>exosomes                                                              |
| This work          | Pen-based paper<br>chip                                    | Lytic Exosome/<br>miRNA-21                                 | Lateral flow<br>assay                                       | Enzyme-free catalyzed<br>hairpin assembly                              | 25 fM                                                                         |

**Table S2** Sequences of DNA probes and microRNA

| <b>Name</b> | <b>Sequences (5'-3')</b>                                 |   |    |    |    |    |
|-------------|----------------------------------------------------------|---|----|----|----|----|
| HP1         | 1                                                        | 2 | 3  | 4* | 3* | 2* |
|             | TCAACATC-AGTCTGA-TAAGCTA-CCATGTGTAGA-TAGCTTA-TCAGACT-FAM |   |    |    |    |    |
| HP2         | 3                                                        | 4 | 3* | 2* | 4* |    |
|             | TAAGCTA-TCTACACATGG-TAGCTTA-TCAGACT-CCATGTGTAGA-Biotin   |   |    |    |    |    |
| miR-21      | UAGCUUAUCAGACUGAUGUUGA                                   |   |    |    |    |    |
| miR-210     | CUGUGCGUGUGACAGCGGCUGA                                   |   |    |    |    |    |
| miR-214     | ACAGCAGGCACAGACAGGCAGU                                   |   |    |    |    |    |

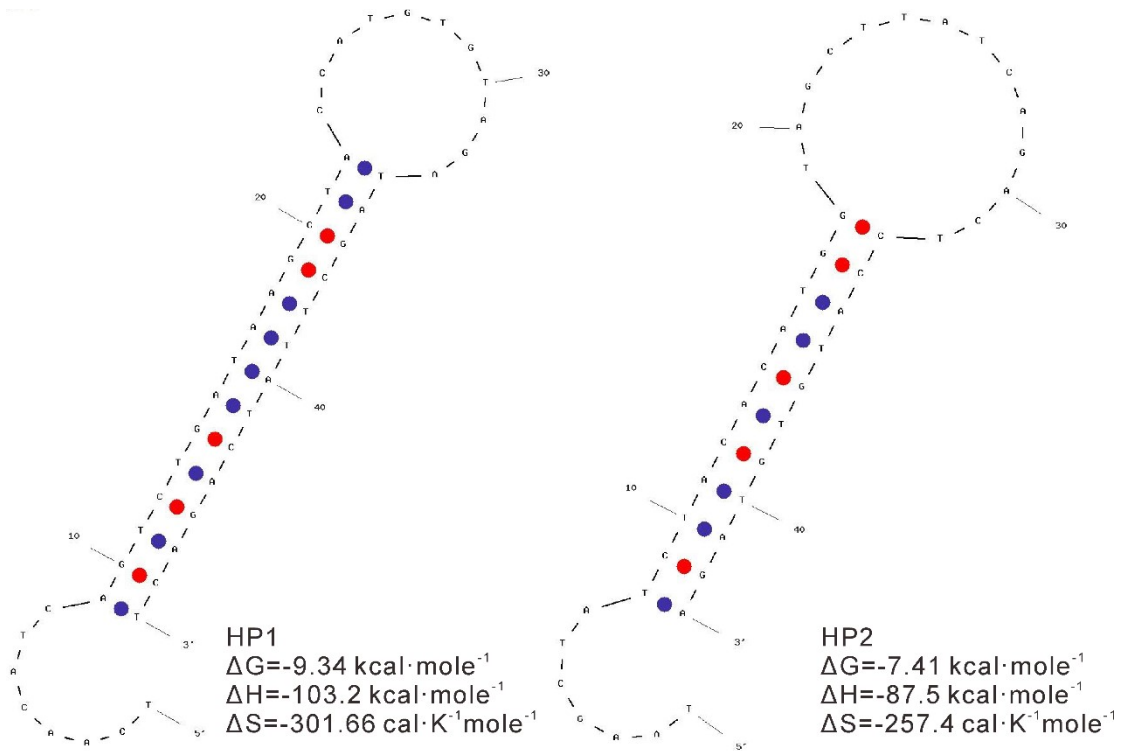

Figure S1. Structure image and thermal kinetic parameters of HP1 probe and HP2 probe.

## References

- [1] X. Li, X. Li, D. Li, M. Zhao, H. Wu, B. Shen, P. Liu, S. Ding, Electrochemical biosensor for ultrasensitive exosomal miRNA analysis by cascade primer exchange reaction and MOF@Pt@MOF nanozyme, *Biosensors & bioelectronics* 168 (2020) 112554, <https://doi.org/10.1016/j.bios.2020.112554>.
- [2] T.X. Li, Y.Q. Liang, J.H. Li, Y. Yu, M.M. Xiao, W. Ni, Z.Y. Zhang, G.J. Zhang, Carbon Nanotube Field-Effect Transistor Biosensor for Ultrasensitive and Label-Free Detection of Breast Cancer Exosomal miRNA21, *Analytical chemistry* 93(46) (2021) 15501-15507, <https://doi.org/10.1021/acs.analchem.1c03573>.
- [3] Y.C. Yang, E. Kannisto, S.K. Patnaik, M.E. Reid, L. Li, Y. Wu, Ultrafast Detection of Exosomal RNAs via Cationic Lipoplex Nanoparticles in a Micromixer Biochip for Cancer Diagnosis, *Acs Appl Nano Mater* 4(3) (2021) 2806-2819, <https://doi.org/10.1021/acsanm.0c03426>.
- [4] J.X. Zhao, C. Liu, Y.K. Li, Y. Ma, J.Q. Deng, L.L. Li, J. Sun, Thermophoretic Detection of Exosomal microRNAs by Nanoflakes, *J Am Chem Soc* 142(11) (2020) 4996-5001, <https://doi.org/10.1021/jacs.9b13960>.
- [5] J.H. Lee, J.A. Kim, S. Jeong, W.J. Rhee, Simultaneous and multiplexed detection of exosome microRNAs using molecular beacons, *Biosensors & bioelectronics* 86 (2016) 202-210, <https://doi.org/10.1016/j.bios.2016.06.058>.
- [6] H.P. Deng, Q.W. Liu, X. Wang, R. Huang, H.X. Liu, Q.M. Lin, X.M. Zhou, D. Xing, Quantum dots-labeled strip biosensor for rapid and sensitive detection of microRNA based on target-recycled nonenzymatic amplification strategy, *Biosensors & bioelectronics* 87 (2017) 931-940, <https://doi.org/10.1016/j.bios.2016.09.043>.
- [7] C.G. Qian, Y.J. Xiao, J. Wang, Y.W. Li, S.J. Li, B. Wei, W. Du, X.J. Feng, P. Chen, B.F. Liu, Rapid exosomes concentration and in situ detection of exosomal microRNA on agarose-based microfluidic chip, *Sensor Actuat B-Chem* 333(15) (2021) 129559, <https://doi.org/10.1016/j.snb.2021.129559>.
